# Supplementary material
Source: ML conference proceedings conference paper supplement (https://openreview.net/forum?id=xflYdGZMpv)
Supplement: supplementary_material [file attachment]

## Appendix

**A** ImageNet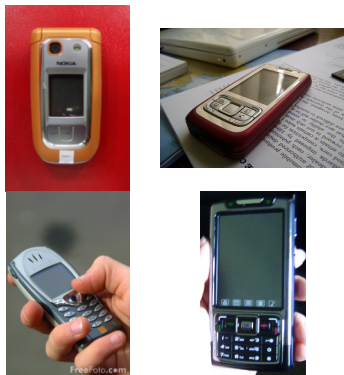**B** CLIP prompts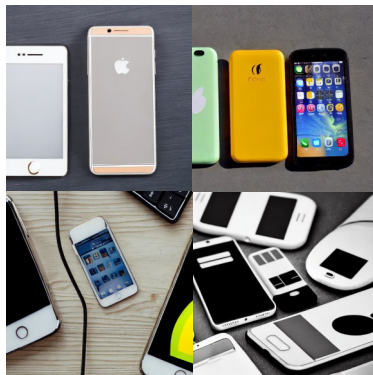**C** Pseudoword+DM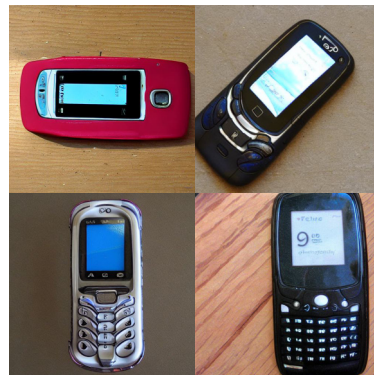

Figure 7: *Fine-tuning the diffusion model resolves the domain gap between ImageNet (collected almost two decades ago) and images generated by the stable diffusion model (trained recently).* **A.** ImageNet examples of the class “cellphone” show devices that were popular in 2006 when ImageNet was collected. **B.** Prompting the pretrained stable diffusion model (here: CLIP PROMPTS) generates images depicting newer cellphones used in recent times. **C.** Fine-tuning the DM (here: PSEUDOWORD+DM) closes this domain gap, as generated images show cellphones akin to the ImageNet samples in panel A.

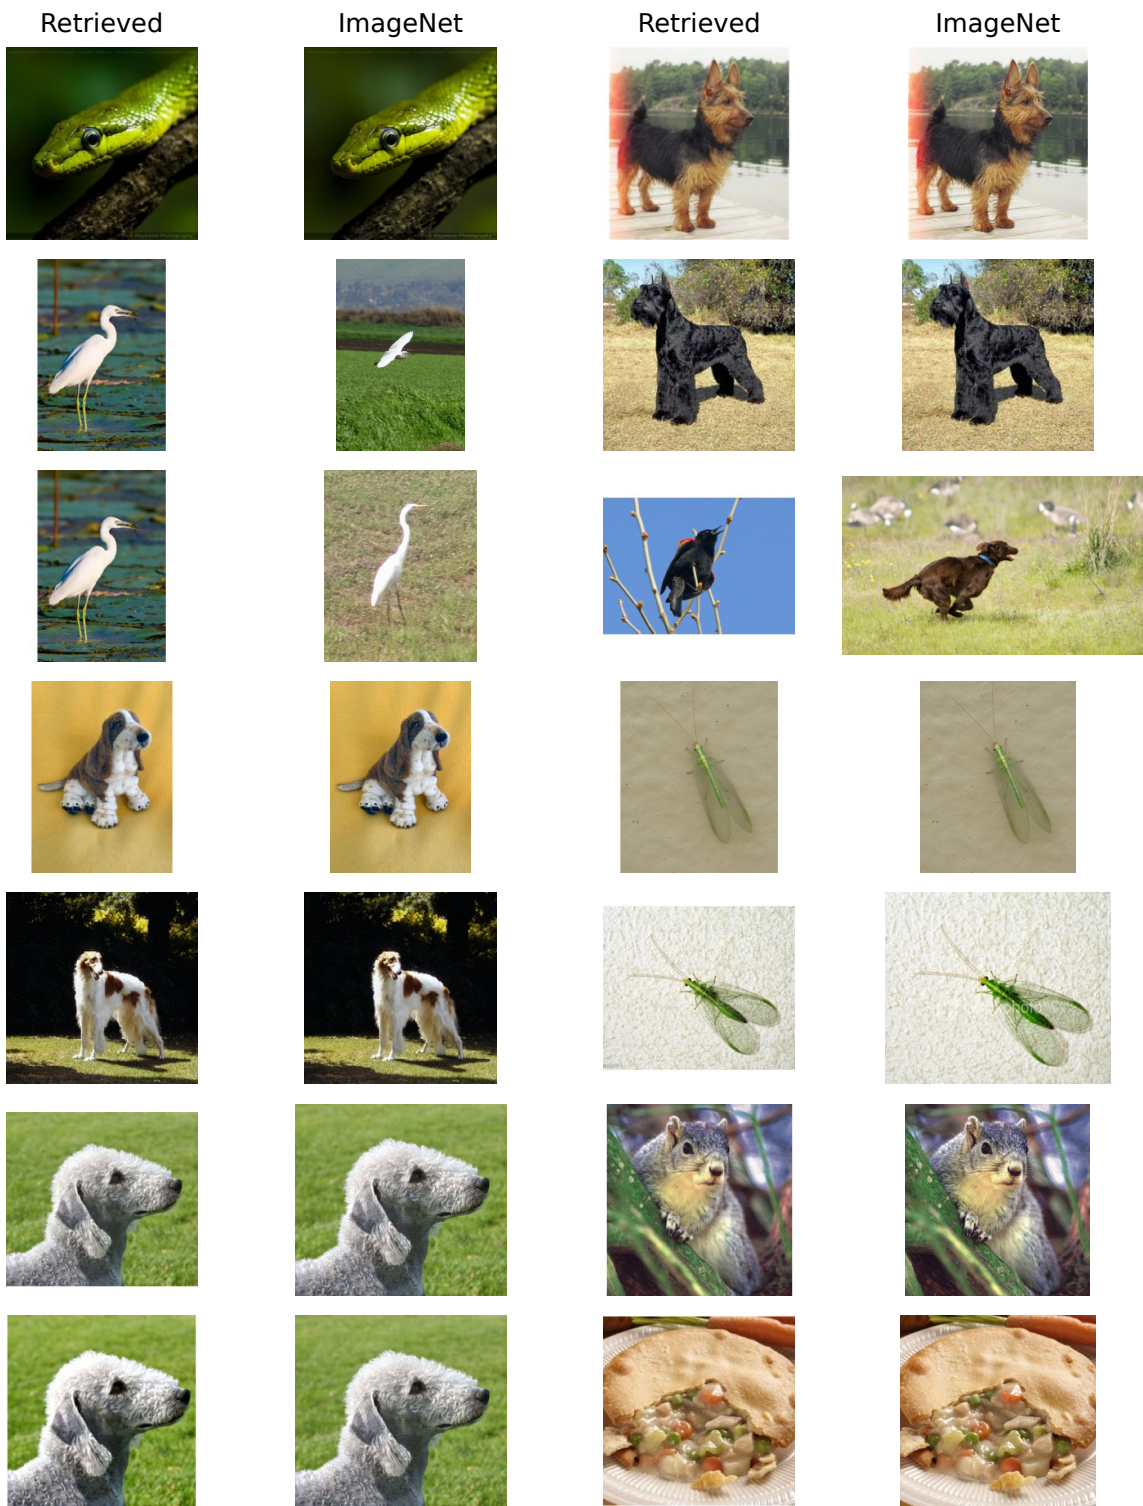

Figure 8: Duplicate candidates found by comparing perceptual image hashes of retrieved images to our ImageNet test-split.



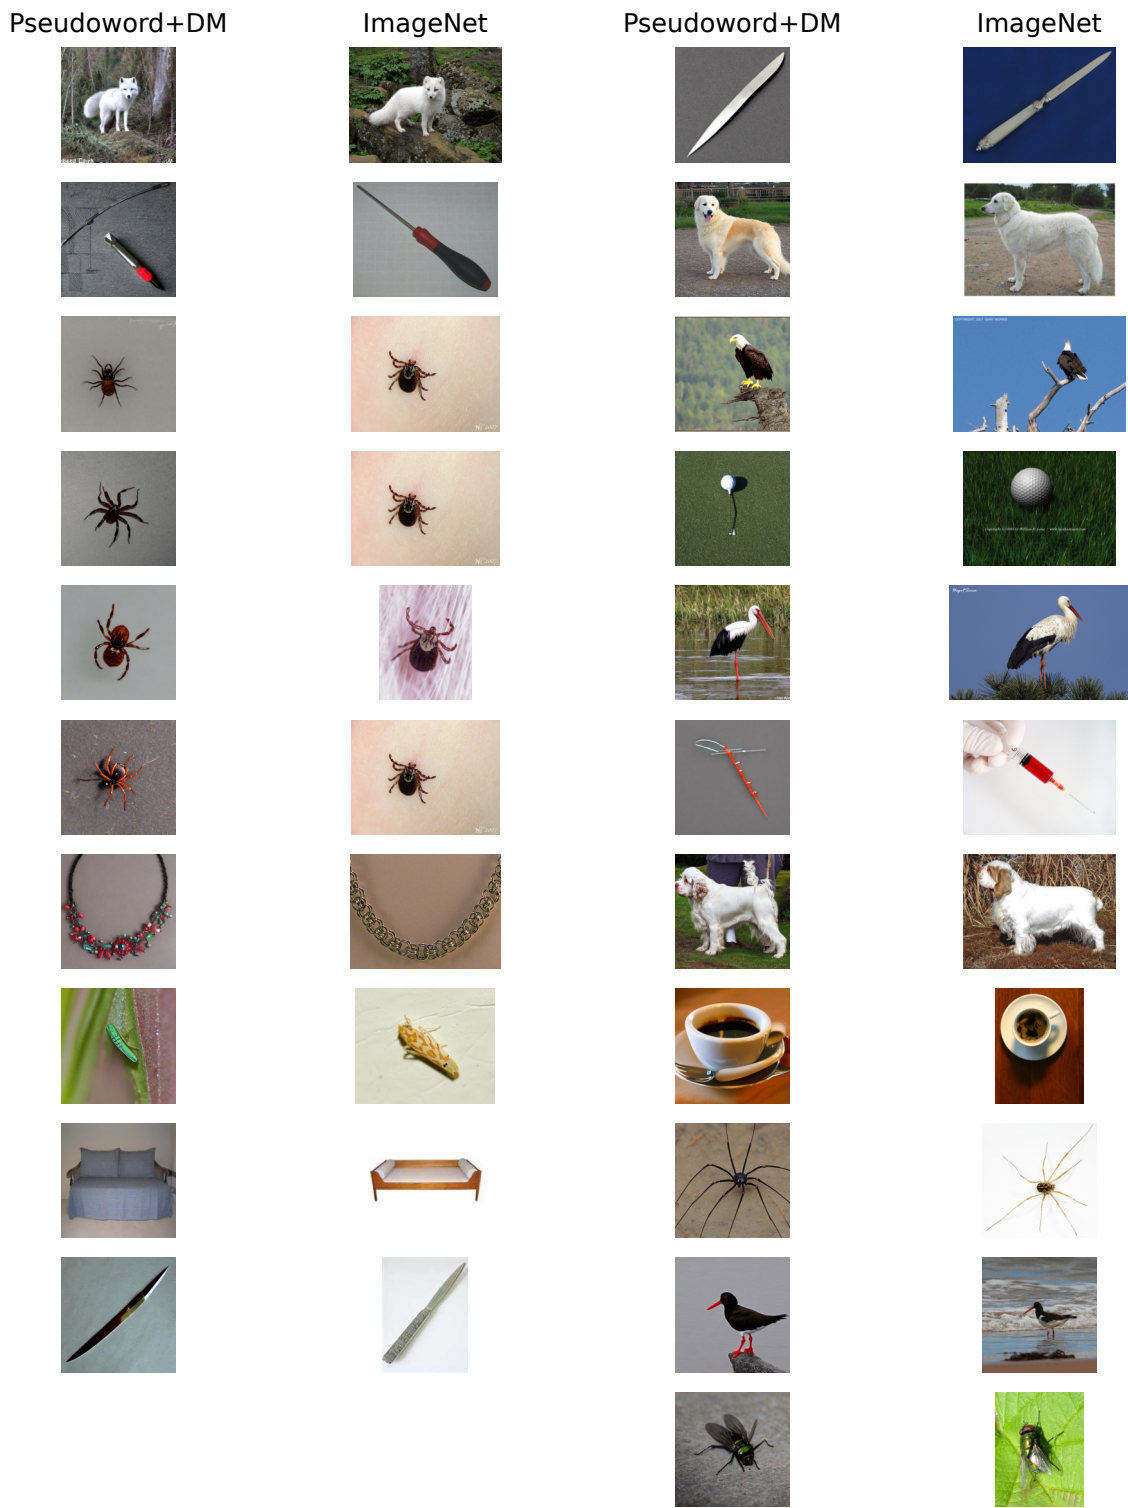

Figure 9: Duplicate candidates found by comparing perceptual image hashes of generated images (PSEUDOWORD+DM) to our ImageNet test-split.

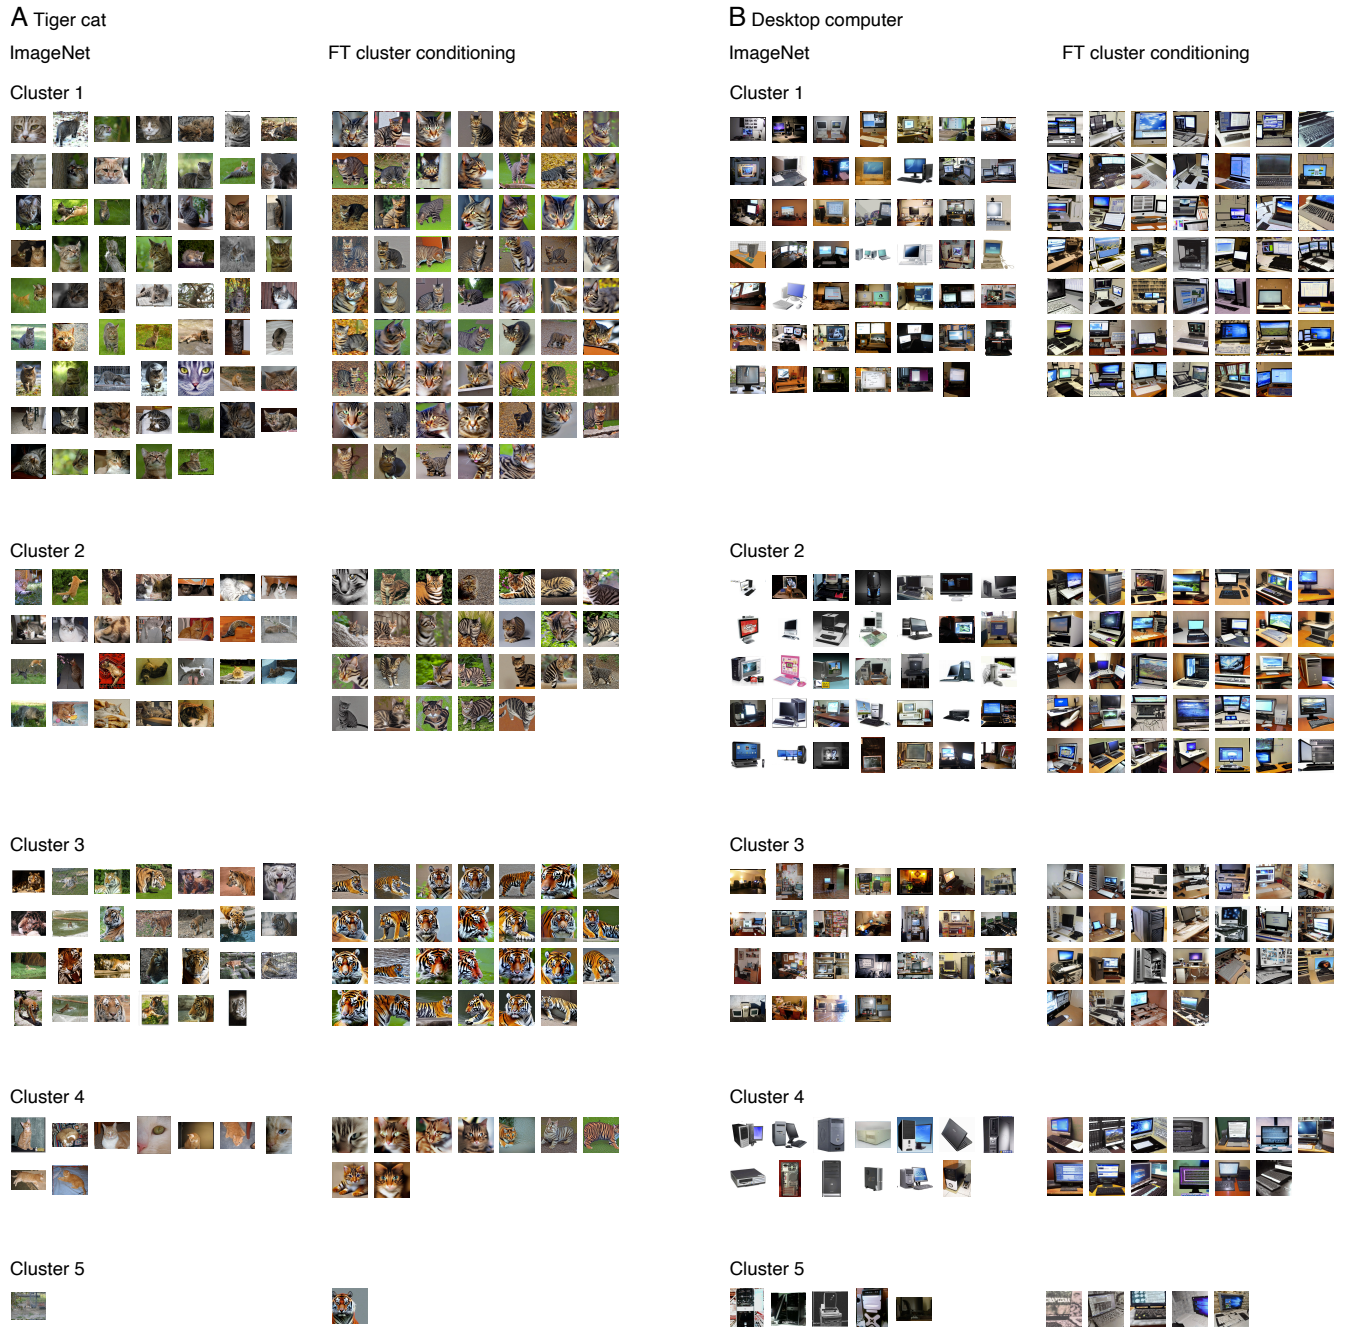

Figure 10: FT CLUSTER CONDITIONING with  $k = 5$  clusters compared to ImageNet. Semantically similar ImageNet images are clustered together and one conditioning is learned for each cluster to reconstruct the training images (see section 3 for details). We exclude images resembling human faces to preserve data privacy. **A.** Examples for the class “tiger cat” which is ambiguous in ImageNet itself (left column). **B.** Examples for the class “desktop computer”. Best viewed when zoomed in.



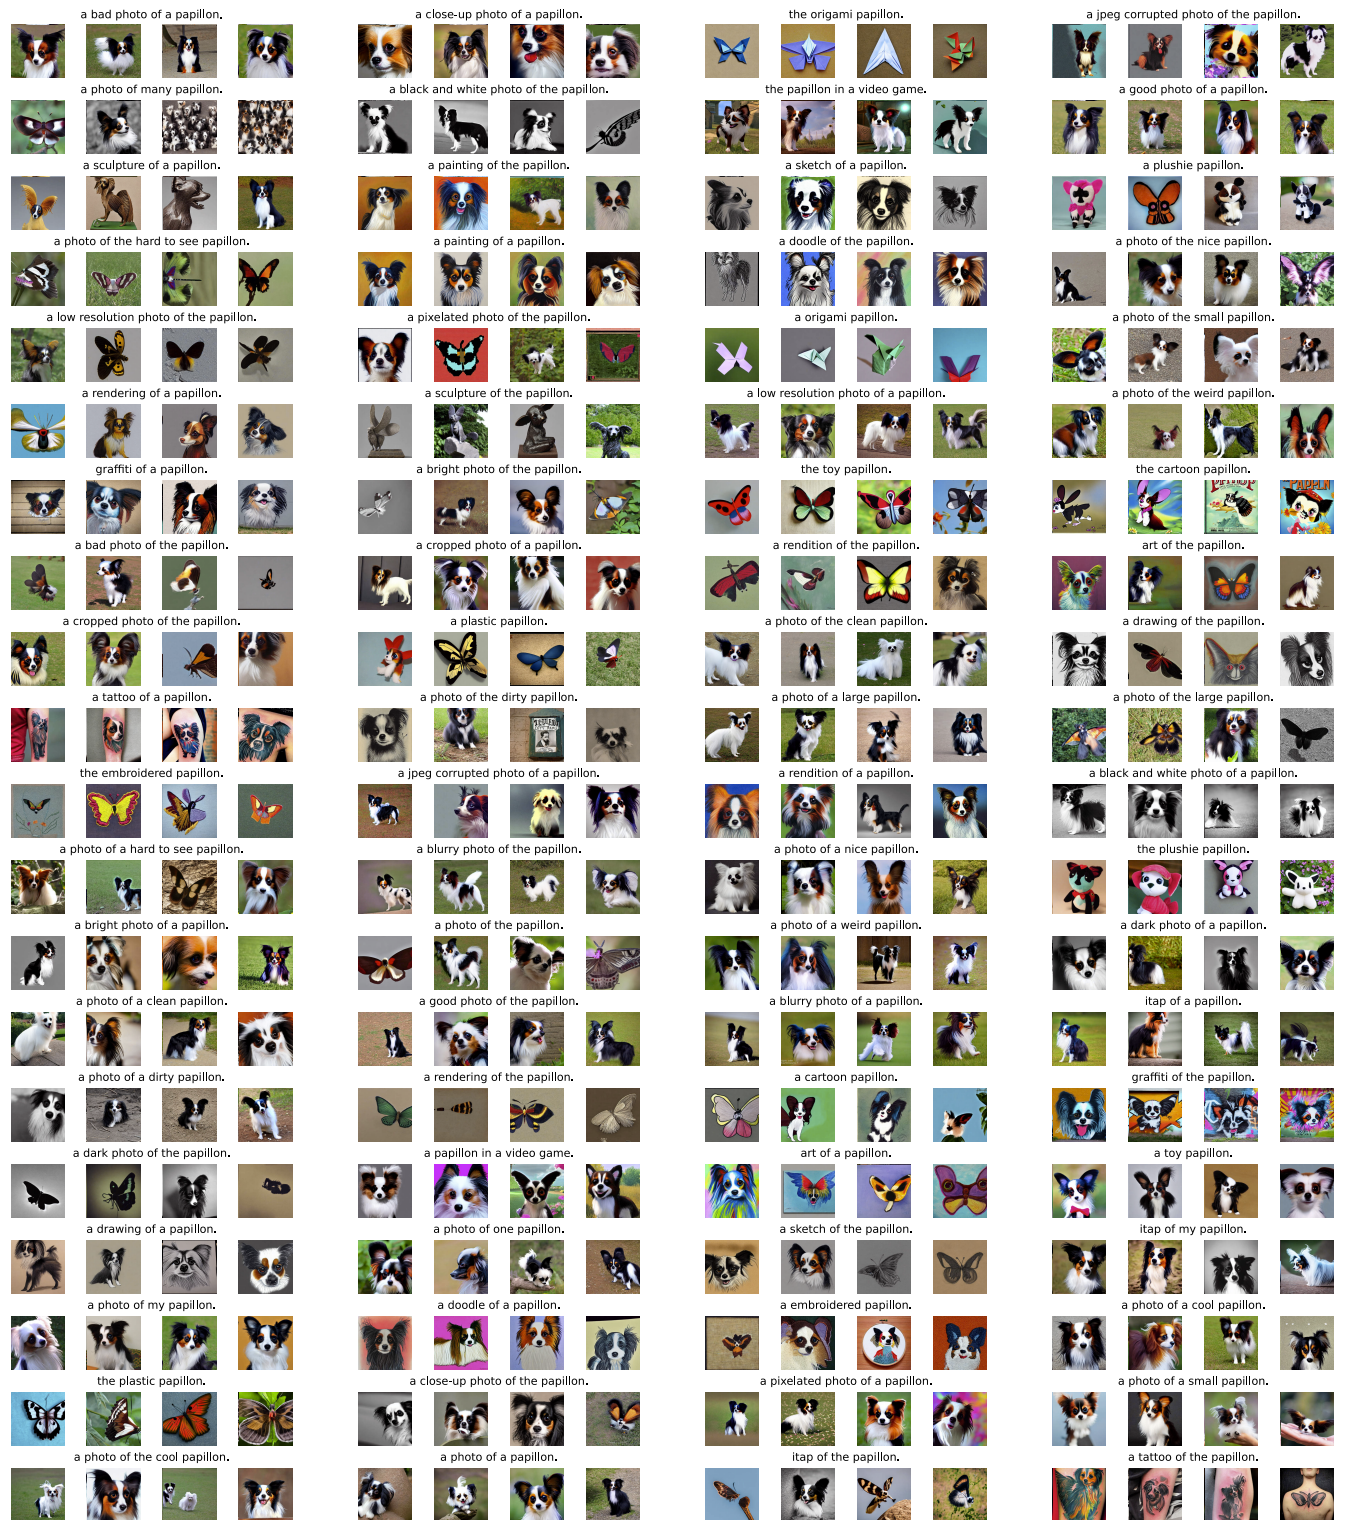

Figure 11: CLIP PROMPTS *examples for each CLIP text template.*



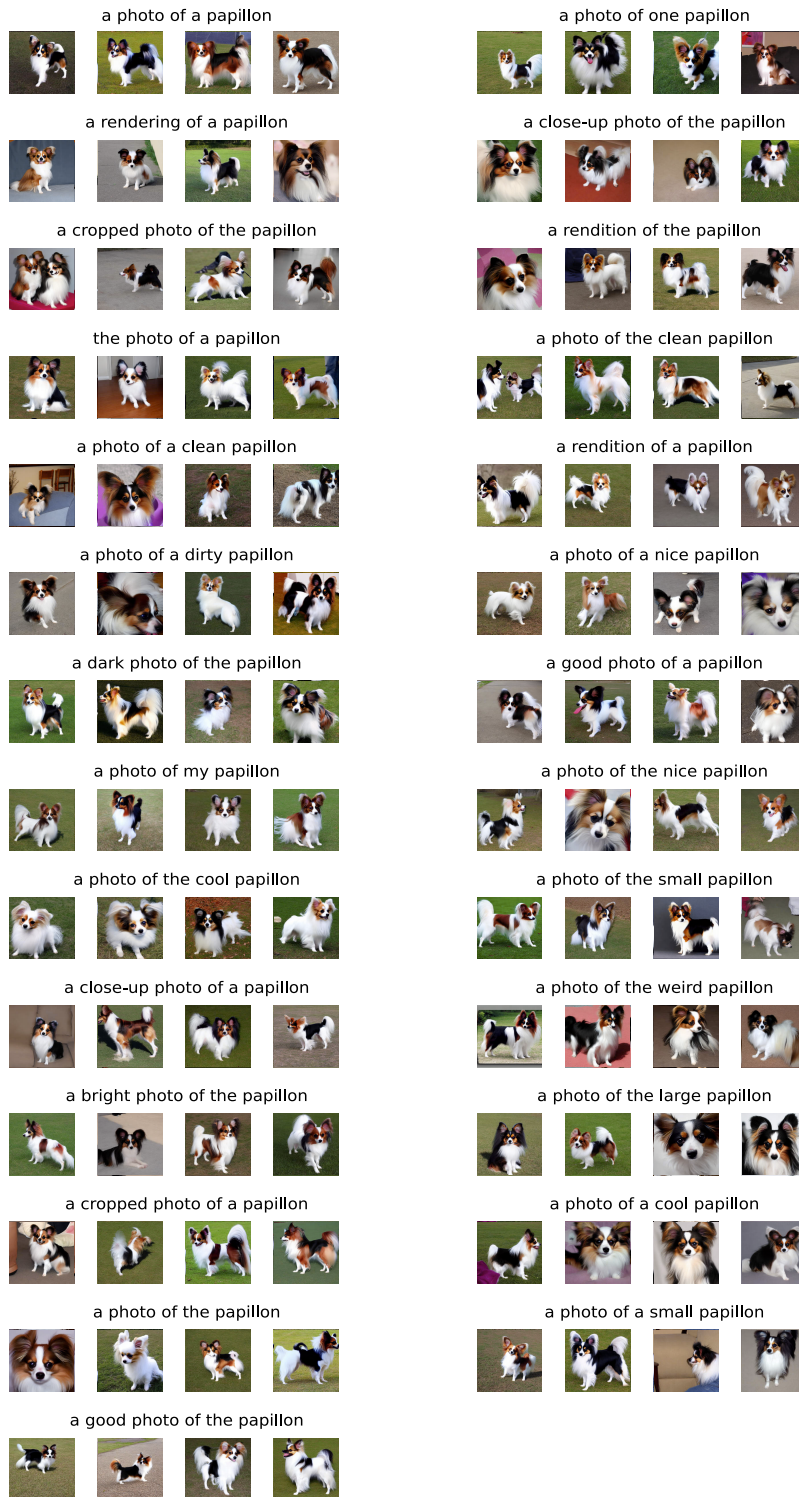

Figure 12: *examples for each TEXTUAL INVERSION text template.*

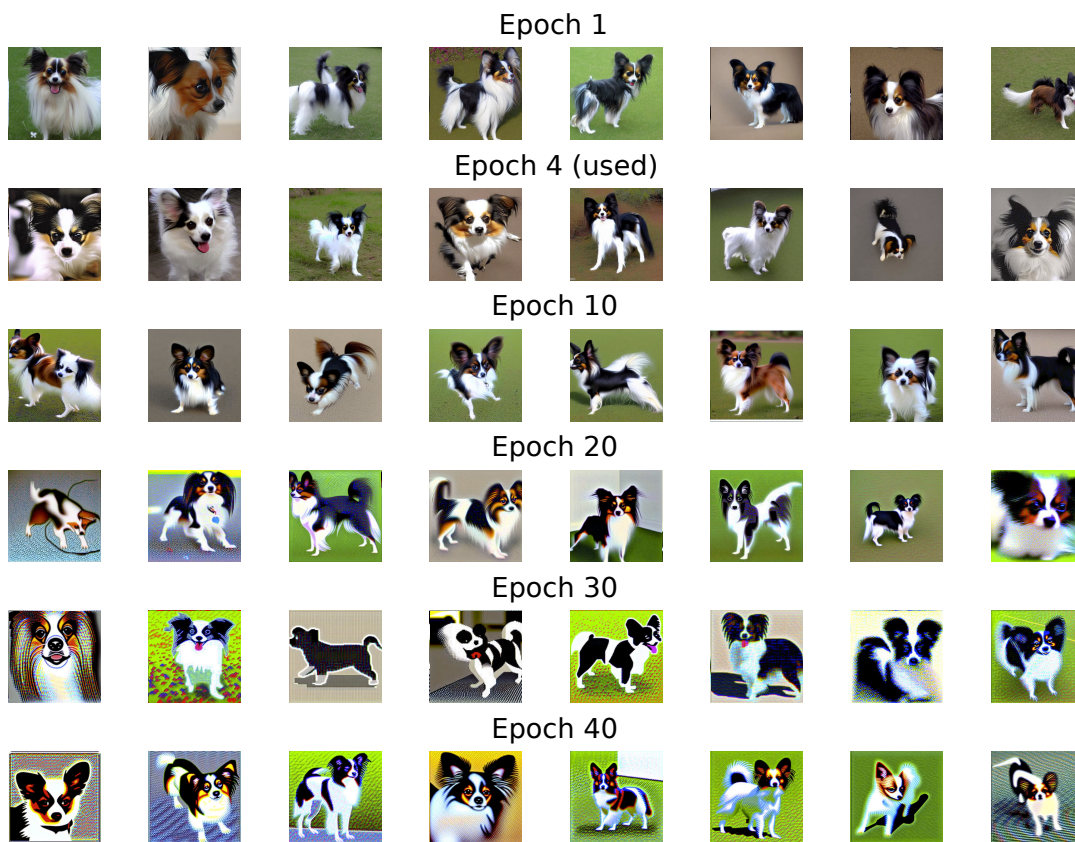

Figure 13: *Examples of IMAGIC optimization for various epochs.*
